# Supplementary material for: Stabilizing ruthenium dioxide with cation-anchored sulfate for durable oxygen evolution in proton-exchange membrane water electrolyzers
Source: PubMed Central journal article supplement (PMC10703920; doi:10.1038/s41467-023-43977-7), 2023-12-07
Supplement: 41467_2023_43977_MOESM1_ESM.pdf [file 41467_2023_43977_MOESM1_ESM.pdf]

# Supplementary Information for

## **Stabilizing ruthenium dioxide with cation-anchored sulfate for durable oxygen evolution in proton-exchange membrane water electrolyzers**

Yanrong Xue,<sup>1,2,7</sup> Jiwu Zhao,<sup>1,2,7</sup> Liang Huang,<sup>1,2</sup> Ying-Rui Lu,<sup>3</sup> Abdul Malek,<sup>1,2</sup> Ge Gao,<sup>1,2</sup> Zhongbin Zhuang,<sup>4</sup> Dingsheng Wang,<sup>5</sup> Cafer T. Yavuz,<sup>6</sup> Xu Lu<sup>1,2\*</sup>

<sup>1</sup>CCRC, Division of Physical Science and Engineering (PSE), King Abdullah University of Science and Technology (KAUST), Thuwal, 23955-6900, Kingdom of Saudi Arabia.

<sup>2</sup>KAUST Solar Center (KSC), PSE, KAUST, Thuwal, Kingdom of Saudi Arabia.

<sup>3</sup>National Synchrotron Radiation Research Center, Hsinchu 300, Taiwan.

<sup>4</sup>State Key Lab of Organic-Inorganic Composites, Beijing University of Chemical Technology, Beijing 100029, China.

<sup>5</sup>Department of Chemistry, Tsinghua University, Beijing 100084, China.

<sup>6</sup>Advanced Membranes and Porous Materials Center (AMPM), PSE, KAUST, Thuwal, Kingdom of Saudi Arabia.

<sup>7</sup>These authors contributed equally.

\*Corresponding author. Email: Xu Lu (xu.lu@kaust.edu.sa).

## **Table of contents**

|                               |                       |
|-------------------------------|-----------------------|
| Supplementary Figures 1-33    | Page 3-36             |
| Supplementary Notes 1-5       | Page 3, 6, 16, 22, 33 |
| Supplementary Tables 1-8      | Page 37-44            |
| Supplementary References 1-15 | Page 45               |

## Supplementary Figures

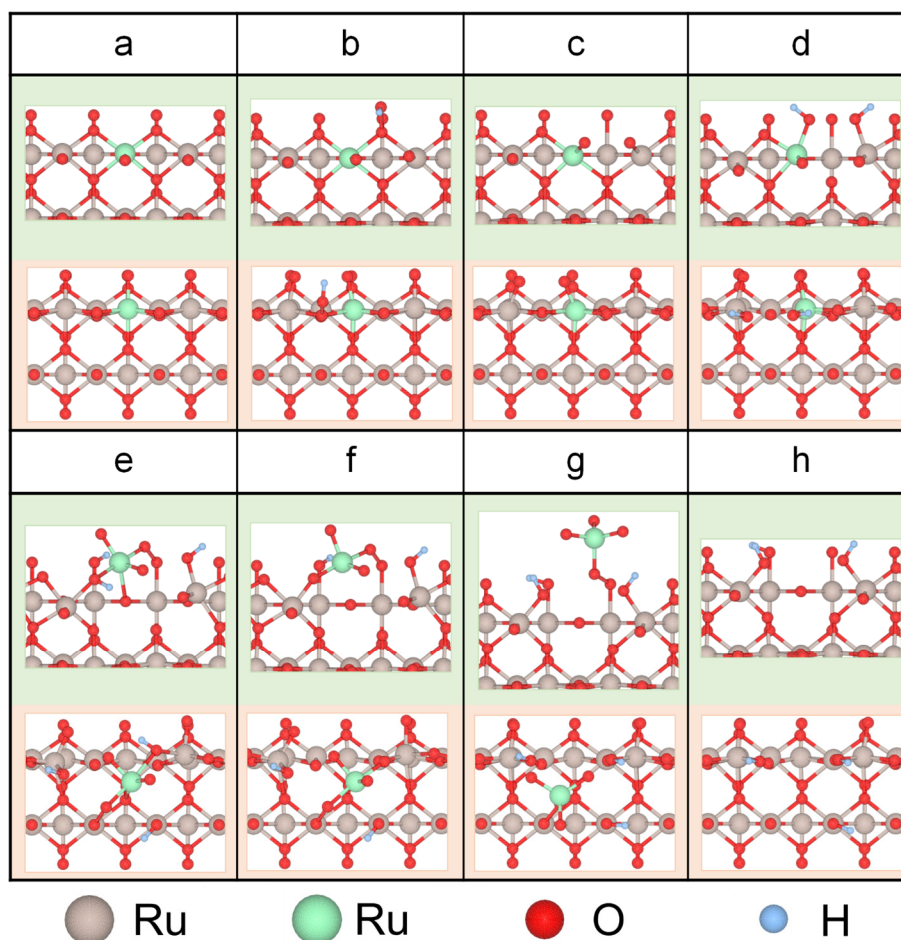

**Supplementary Figure 1** Atomic structure of  $\text{RuO}_2$  and intermediates during Ru dissolution. Of note, the green ball represents the Ru atom on the grain edge.

## Supplementary Notes

**Supplementary Note 1:** In this work, we use the boundary between  $\text{RuO}_2$  (110) and  $\text{RuO}_2$  ( $-110$ ) planes as our model. At first, an  $\text{H}_2\text{O}$  molecule is adsorbed onto a bridging O site on the grain edges and deprotonated to form  $^*\text{OH}$  (a to b). Then, the  $^*\text{OH}$  and a lattice O connected to it are deprotonated to release an  $\text{O}_2$  molecule (b to c). In parallel, two  $\text{H}_2\text{O}$  molecules are separately adsorbed on two Ru atoms and deprotonated to form two  $^*\text{OH}$  (c to d). Then, an  $\text{H}_2\text{O}$  molecule is adsorbed onto a new Ru atom adjacent to the Ru atom (green ball) and deprotonated to form  $^*\text{OH}$ . At this time, the Ru-O-Ru (green ball) bond is broken, and the unstable Ru (green ball) group starts to rotate, resulting in the formation of Ru-O-O-Ru (green ball), Ru-O-Ru (the O atom from  $^*\text{OH}$ ), and proton transfer process (d to e). Afterward, the Ru-O-Ru (the O atom from  $^*\text{OH}$ ) is deprotonated to form Ru-O-Ru (e to f). Next, an  $\text{H}_2\text{O}$  molecule is adsorbed to the Ru atom and deprotonated to form  $^*\text{OH}$ , accompanied by the breaking of a Ru-O-Ru bond (f to g). Finally, the  $\text{RuO}_4$  leaves the crystal (g to h).

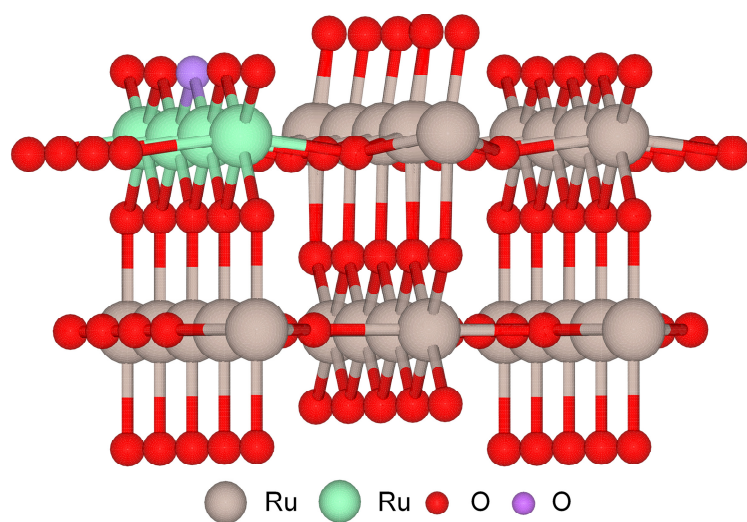

**Supplementary Figure 2** Ball-and-stick model of the RuO<sub>2</sub> (110) plane. Of note, the green and purple balls represent Ru and O atoms, respectively, on the grain edges.

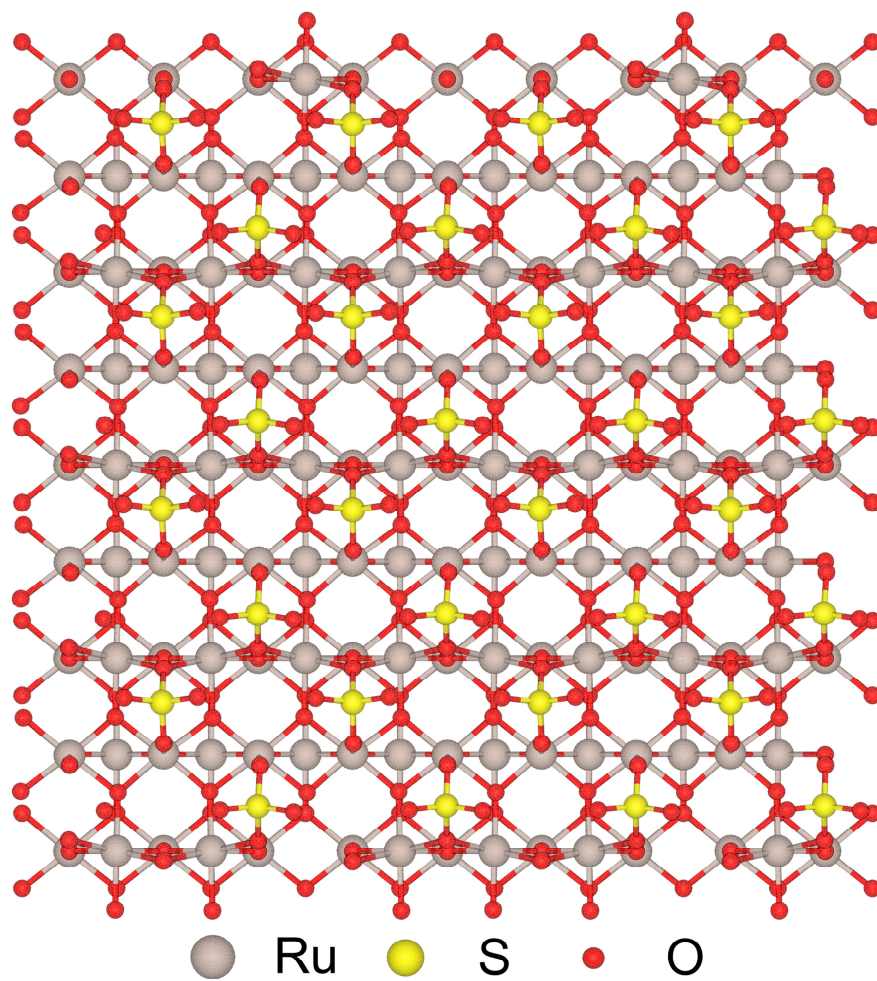

**Supplementary Figure 3** Ball-and-stick model of sulfate bound with RuO<sub>2</sub> (110) plane.

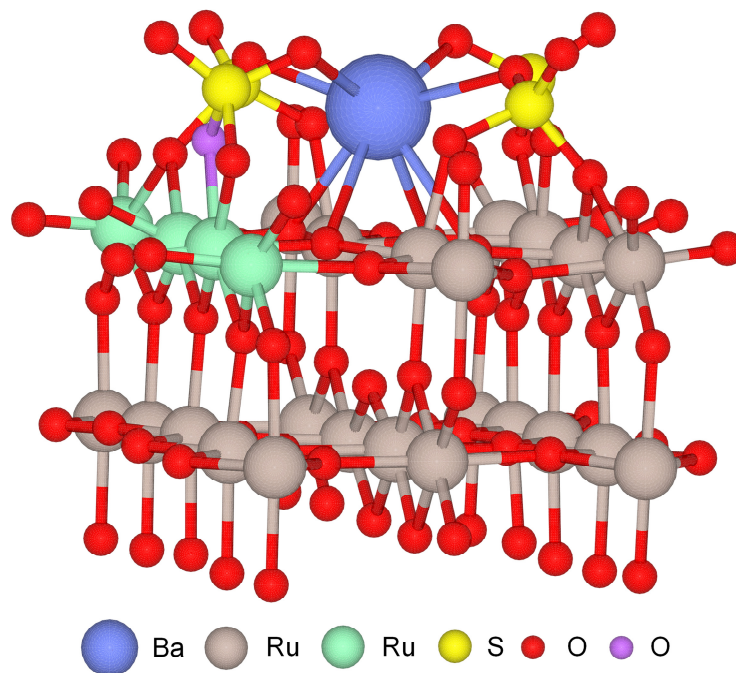

**Supplementary Figure 4** Ball-and-stick model of Ba-anchored sulfate on the RuO<sub>2</sub> (110) plane. Of note, the green and purple balls represent Ru and O atoms, respectively, on the grain edges.

**Supplementary Note 2:** In this model, two O atoms of a sulfate bond to Ru atoms, and Ba atom bonds with one O atom of sulfate to fix the sulfate on the RuO<sub>2</sub> (110) plane. When calculating the binding energy of sulfate with other metal cations, Ba was replaced by other elements.

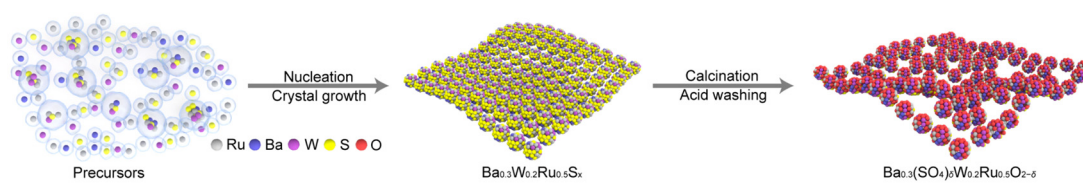

**Supplementary Figure 5** Schematic illustrating the synthesis process of  $\text{Ba}_{0.3}(\text{SO}_4)_\delta\text{W}_{0.2}\text{Ru}_{0.5}\text{O}_{2-\delta}$ .

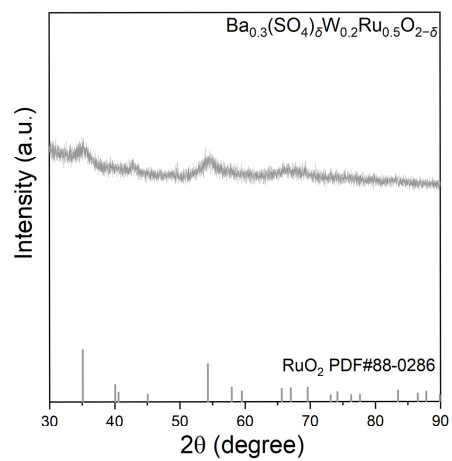

**Supplementary Figure 6** XRD pattern of  $\text{Ba}_{0.3}(\text{SO}_4)_\delta\text{W}_{0.2}\text{Ru}_{0.5}\text{O}_{2-\delta}$ .



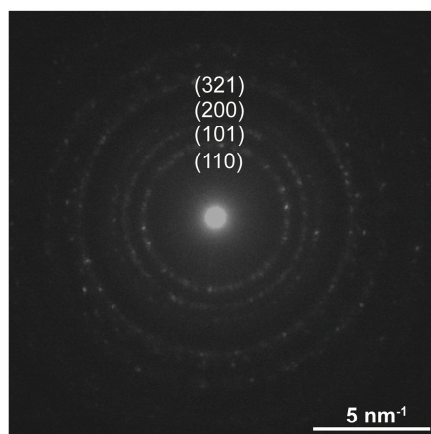

**Supplementary Figure 7** SAED pattern of the  $\text{Ba}_{0.3}(\text{SO}_4)_\delta\text{W}_{0.2}\text{Ru}_{0.5}\text{O}_{2-\delta}$ .

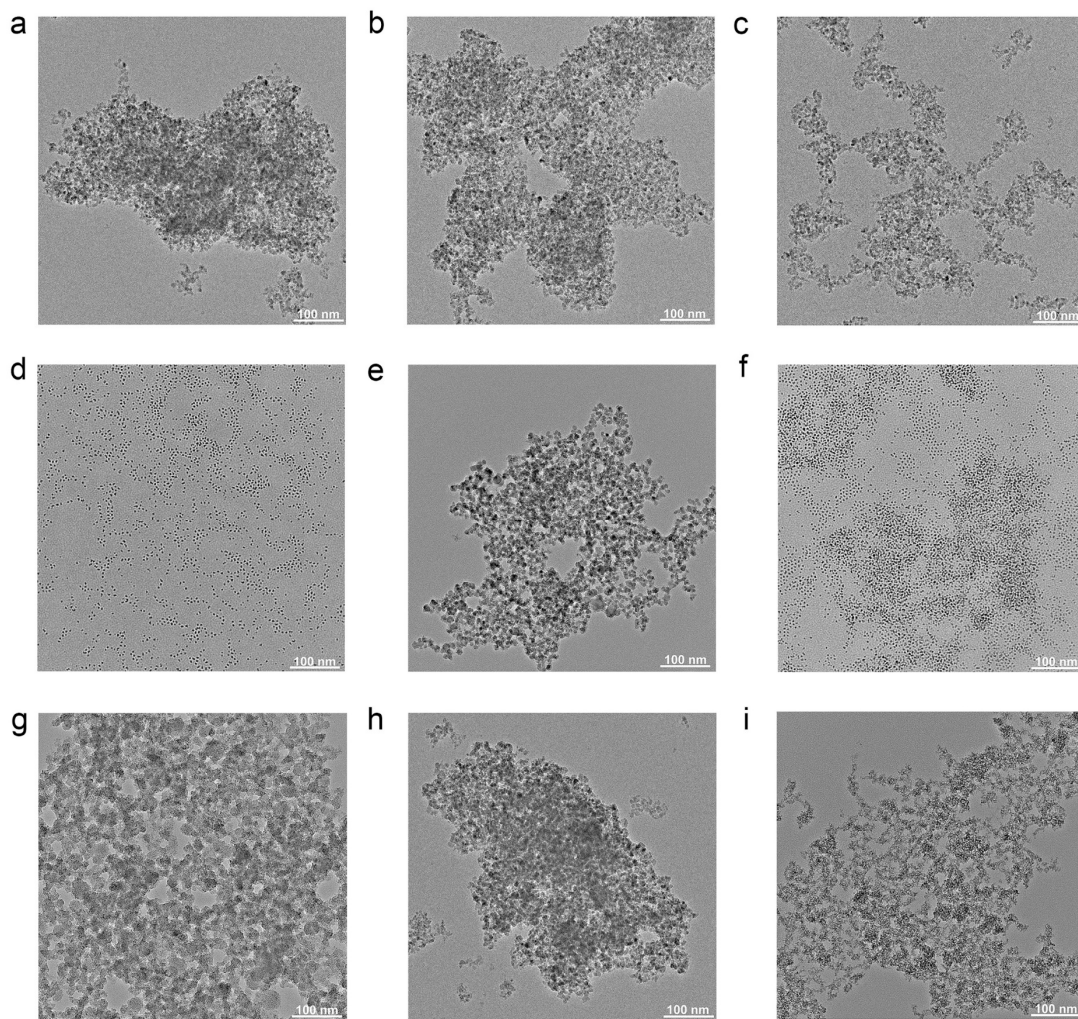

**Supplementary Figure 8 a-i** TEM images of **(a)**  $\text{Ba}_{0.2}(\text{SO}_4)_\delta\text{W}_{0.1}\text{Ru}_{0.7}\text{O}_{2-\delta}$ , **(b)**  $\text{Ba}_{0.4}(\text{SO}_4)_\delta\text{W}_{0.2}\text{Ru}_{0.4}\text{O}_{2-\delta}$ , and **(c)**  $\text{Ba}_{0.4}(\text{SO}_4)_\delta\text{W}_{0.3}\text{Ru}_{0.3}\text{O}_{2-\delta}$ , **(d)** as-prepared  $\text{RuO}_2$ , **(e)**  $\text{W}_{0.3}\text{Ru}_{0.7}\text{O}_2$ , **(f)**  $\text{Ba}_{0.4}\text{Ru}_{0.6}\text{O}_2$ , **(g)**  $(\text{SO}_4)_\delta\text{RuO}_{2-\delta}$ , and **(h)**  $\text{Ba}_{0.4}(\text{SO}_4)_\delta\text{Ru}_{0.6}\text{O}_{2-\delta}$ , and **(i)**  $\text{W}_{0.3}(\text{SO}_4)_\delta\text{Ru}_{0.7}\text{O}_{2-\delta}$ .

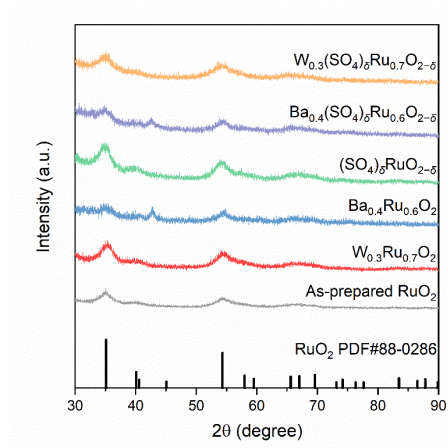

**Supplementary Figure 9** XRD patterns of as-prepared  $\text{RuO}_2$ ,  $\text{W}_{0.3}\text{Ru}_{0.7}\text{O}_2$ ,  $\text{Ba}_{0.4}\text{Ru}_{0.6}\text{O}_2$ ,  $(\text{SO}_4)_\delta\text{RuO}_{2-\delta}$ ,  $\text{Ba}_{0.4}(\text{SO}_4)_\delta\text{Ru}_{0.6}\text{O}_{2-\delta}$ , and  $\text{W}_{0.3}(\text{SO}_4)_\delta\text{Ru}_{0.7}\text{O}_{2-\delta}$ .

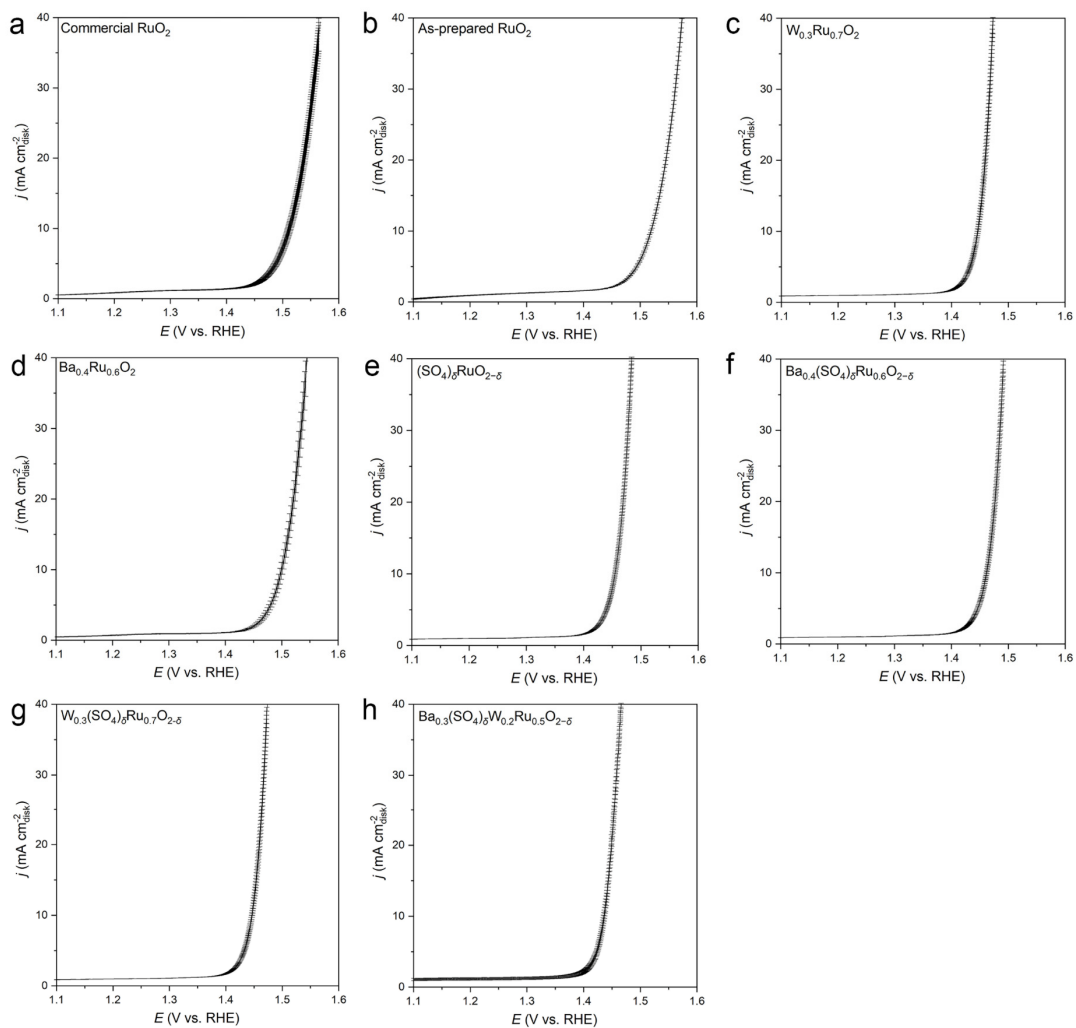

**Supplementary Figure 10 a-h** The mean OER polarization curves with error bars for (a) commercial RuO<sub>2</sub>, (b) as-prepared RuO<sub>2</sub>, (c) W<sub>0.3</sub>Ru<sub>0.7</sub>O<sub>2</sub>, (d) Ba<sub>0.4</sub>Ru<sub>0.6</sub>O<sub>2</sub>, (e) (SO<sub>4</sub>)<sub>δ</sub>RuO<sub>2-δ</sub>, (f) Ba<sub>0.4</sub>(SO<sub>4</sub>)<sub>δ</sub>Ru<sub>0.6</sub>O<sub>2-δ</sub>, (g) W<sub>0.3</sub>(SO<sub>4</sub>)<sub>δ</sub>Ru<sub>0.7</sub>O<sub>2-δ</sub>, and (h) Ba<sub>0.3</sub>(SO<sub>4</sub>)<sub>δ</sub>W<sub>0.2</sub>Ru<sub>0.5</sub>O<sub>2-δ</sub> based on three independent tests.

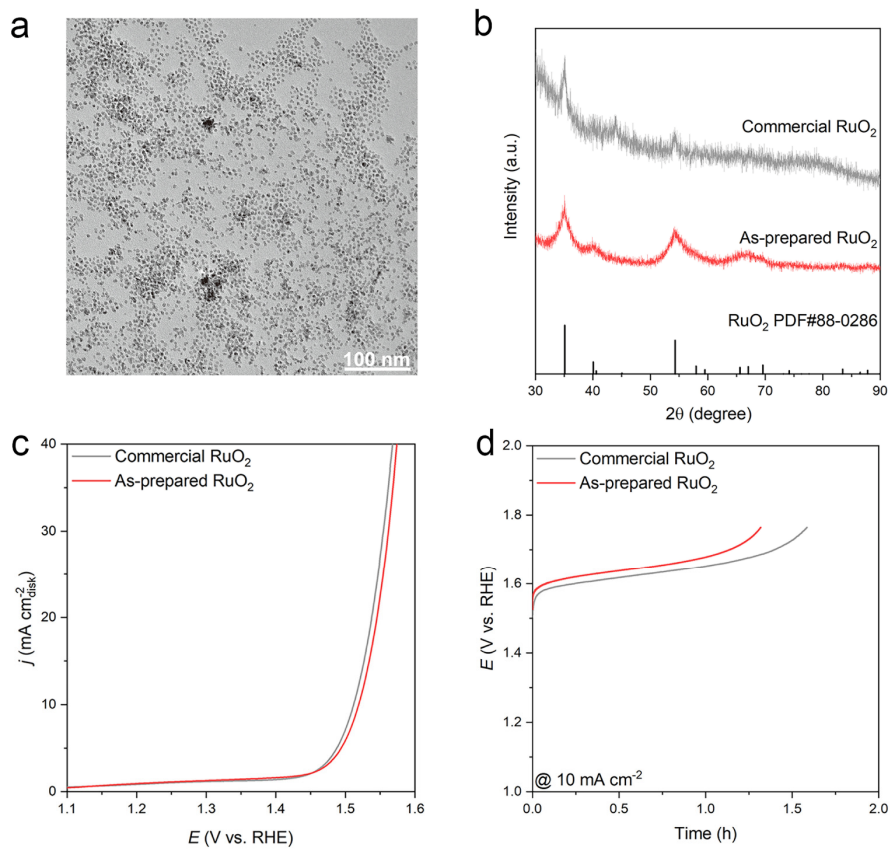

**Supplementary Figure 11** **a** TEM images of commercial RuO<sub>2</sub>. **b** XRD patterns of commercial RuO<sub>2</sub> and as-prepared RuO<sub>2</sub>. **c** OER polarization curves of commercial RuO<sub>2</sub> and as-prepared RuO<sub>2</sub>. **d** Chronopotentiogram of commercial RuO<sub>2</sub> and as-prepared RuO<sub>2</sub> at 10 mA cm<sup>-2</sup> in 0.5 M H<sub>2</sub>SO<sub>4</sub>.

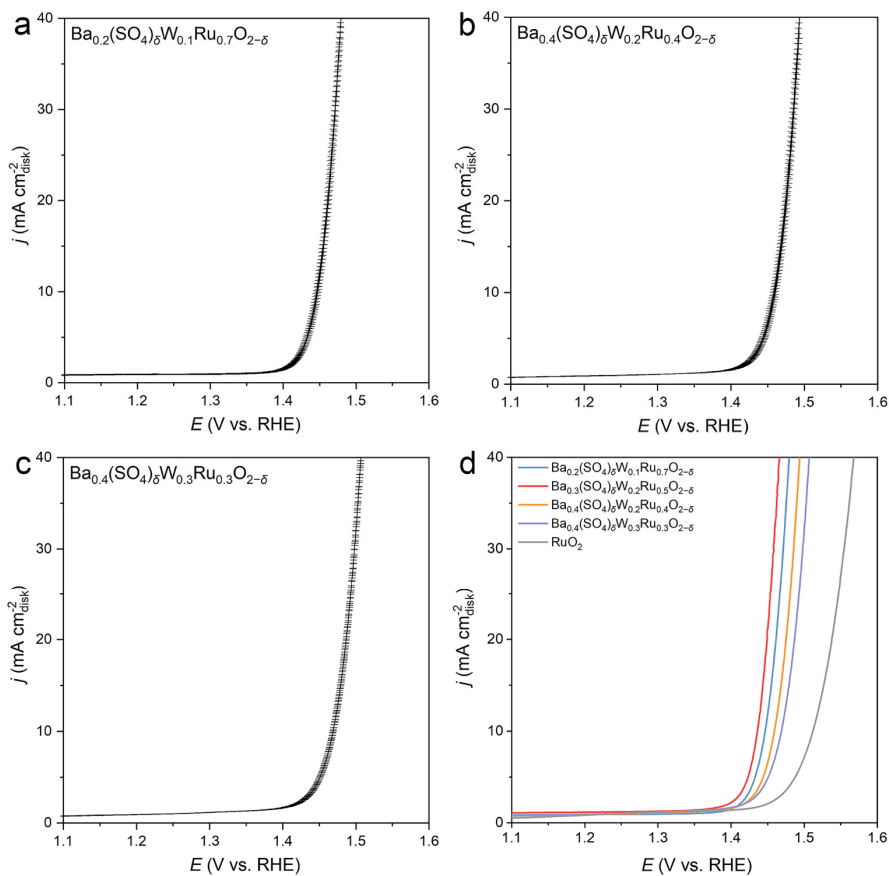

**Supplementary Figure 12 a-c** The mean OER polarization curves with error bars for (a)  $\text{Ba}_{0.2}(\text{SO}_4)_\delta\text{W}_{0.1}\text{Ru}_{0.7}\text{O}_{2-\delta}$ , (b)  $\text{Ba}_{0.4}(\text{SO}_4)_\delta\text{W}_{0.2}\text{Ru}_{0.4}\text{O}_{2-\delta}$ , (c)  $\text{Ba}_{0.4}(\text{SO}_4)_\delta\text{W}_{0.3}\text{Ru}_{0.3}\text{O}_{2-\delta}$  based on three independent tests. **d** OER polarization curves of  $\text{RuO}_2$ ,  $\text{Ba}_{0.2}(\text{SO}_4)_\delta\text{W}_{0.1}\text{Ru}_{0.7}\text{O}_{2-\delta}$ ,  $\text{Ba}_{0.3}(\text{SO}_4)_\delta\text{W}_{0.2}\text{Ru}_{0.5}\text{O}_{2-\delta}$ ,  $\text{Ba}_{0.4}(\text{SO}_4)_\delta\text{W}_{0.2}\text{Ru}_{0.4}\text{O}_{2-\delta}$ , and  $\text{Ba}_{0.4}(\text{SO}_4)_\delta\text{W}_{0.3}\text{Ru}_{0.3}\text{O}_{2-\delta}$ .

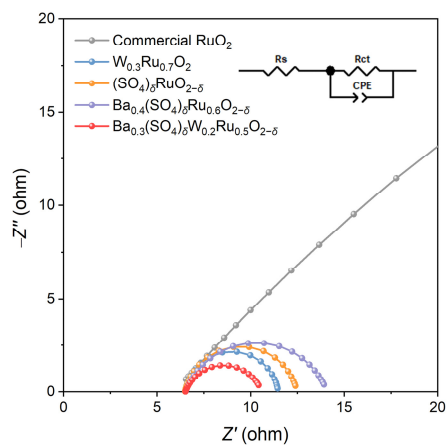

**Supplementary Figure 13** Nyquist plots of commercial RuO<sub>2</sub>, W<sub>0.3</sub>Ru<sub>0.7</sub>O<sub>2</sub>, (SO<sub>4</sub>)<sub>δ</sub>RuO<sub>2-δ</sub>, Ba<sub>0.4</sub>(SO<sub>4</sub>)<sub>δ</sub>Ru<sub>0.6</sub>O<sub>2-δ</sub>, and Ba<sub>0.3</sub>(SO<sub>4</sub>)<sub>δ</sub>W<sub>0.2</sub>Ru<sub>0.5</sub>O<sub>2-δ</sub>.

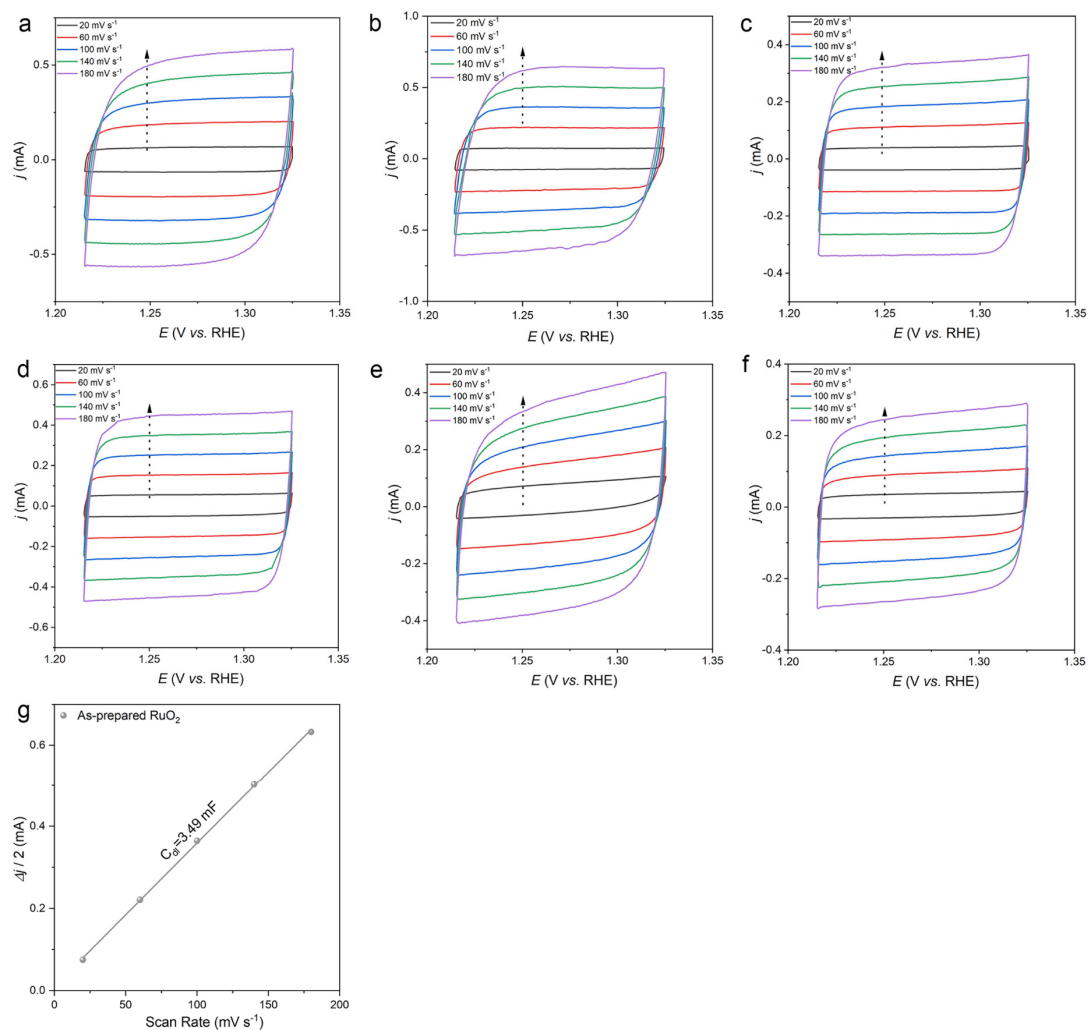

**Supplementary Figure 14 a-f** Cyclic voltammograms of (a) commercial  $\text{RuO}_2$ , (b) as-prepared  $\text{RuO}_2$ , (c)  $\text{W}_{0.3}\text{Ru}_{0.7}\text{O}_2$ , (d)  $(\text{SO}_4)_\delta\text{RuO}_{2-\delta}$ , (e)  $\text{Ba}_{0.4}(\text{SO}_4)_\delta\text{Ru}_{0.6}\text{O}_{2-\delta}$ , and (f)  $\text{Ba}_{0.3}(\text{SO}_4)_\delta\text{W}_{0.2}\text{Ru}_{0.5}\text{O}_{2-\delta}$  at scan rates of 20, 60, 100, 140, and 180  $\text{mV s}^{-1}$ . **g**  $C_{dl}$  plots of as-prepared  $\text{RuO}_2$  at 1.25 V.

**Supplementary Note 3:** For particles, both the specific surface area and the ECSA increase with the decrease of the size. In comparison to commercial  $\text{RuO}_2$ , the size of as-prepared  $\text{RuO}_2$  is smaller, resulting in a larger  $C_{dl}$  and ECSA (Supplementary Fig. 14g). After the formation of Ru alloys with Ba or W, the particle size becomes larger, leading to a smaller ECSA. Additionally, Ru coordinates with sulfate to easily form a large nanosheet-like structure, which can also reduce the ECSA.



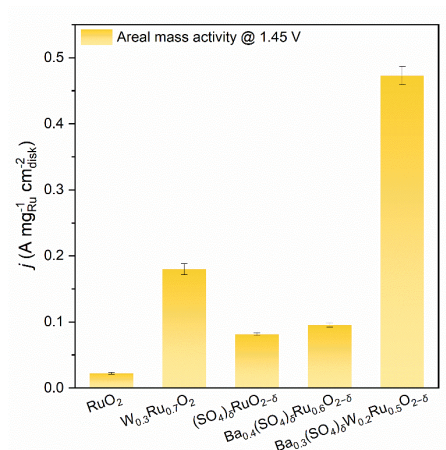

**Supplementary Figure 15** Areal mass activity at 1.45 V of commercial RuO<sub>2</sub>, W<sub>0.3</sub>Ru<sub>0.7</sub>O<sub>2</sub>, (SO<sub>4</sub>)<sub>δ</sub>RuO<sub>2-δ</sub>, Ba<sub>0.4</sub>(SO<sub>4</sub>)<sub>δ</sub>Ru<sub>0.6</sub>O<sub>2-δ</sub>, and Ba<sub>0.3</sub>(SO<sub>4</sub>)<sub>δ</sub>W<sub>0.2</sub>Ru<sub>0.5</sub>O<sub>2-δ</sub>.

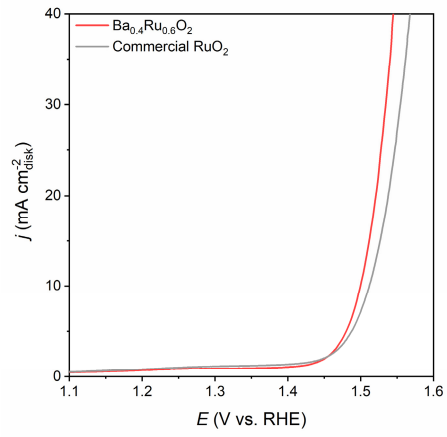

**Supplementary Figure 16** OER polarization curves of  $\text{Ba}_{0.4}\text{Ru}_{0.6}\text{O}_2$  and commercial  $\text{RuO}_2$ .

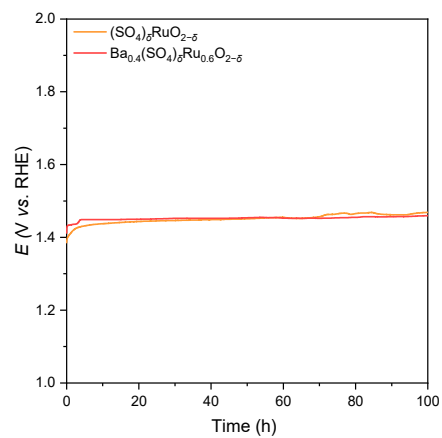

**Supplementary Figure 17** Chronopotentiogram of  $(\text{SO}_4)_\delta\text{RuO}_{2-\delta}$  and  $\text{Ba}_{0.4}(\text{SO}_4)_\delta\text{Ru}_{0.6}\text{O}_{2-\delta}$  at  $10 \text{ mA cm}^{-2}$  in  $0.1 \text{ M HClO}_4$ .

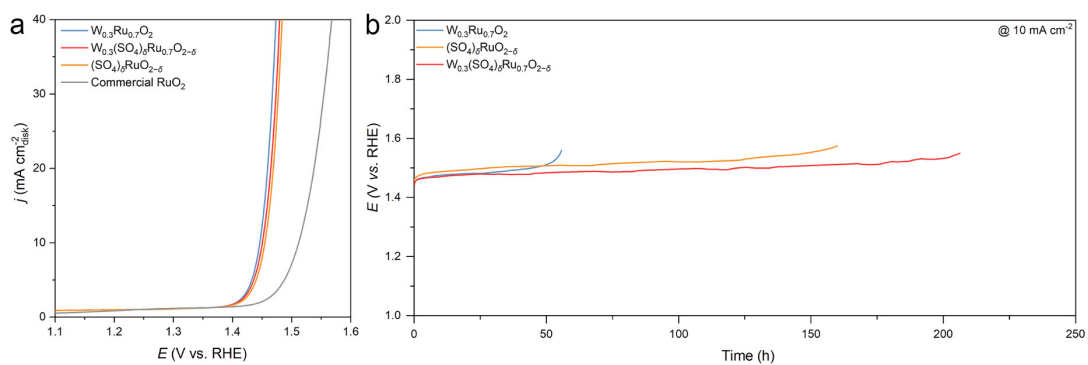

**Supplementary Figure 18 a** OER polarization curves of commercial  $RuO_2$ ,  $W_{0.3}Ru_{0.7}O_2$ ,  $(SO_4)_\delta RuO_{2-\delta}$ , and  $W_{0.3}(SO_4)_\delta Ru_{0.7}O_{2-\delta}$ . **b** Chronopotentiogram of  $W_{0.3}Ru_{0.7}O_2$ ,  $(SO_4)_\delta RuO_{2-\delta}$ , and  $W_{0.3}(SO_4)_\delta Ru_{0.7}O_{2-\delta}$  at 10 mA cm<sup>-2</sup> in 0.5 M H<sub>2</sub>SO<sub>4</sub>.

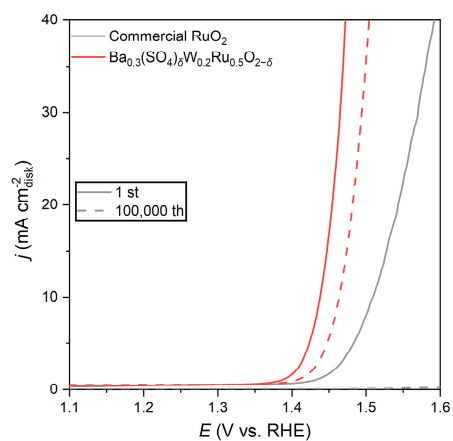

**Supplementary Figure 19** OER polarization curves of commercial RuO<sub>2</sub> and Ba<sub>0.3</sub>(SO<sub>4</sub>)<sub>δ</sub>W<sub>0.2</sub>Ru<sub>0.5</sub>O<sub>2-δ</sub> before and after 100,000 cycles.

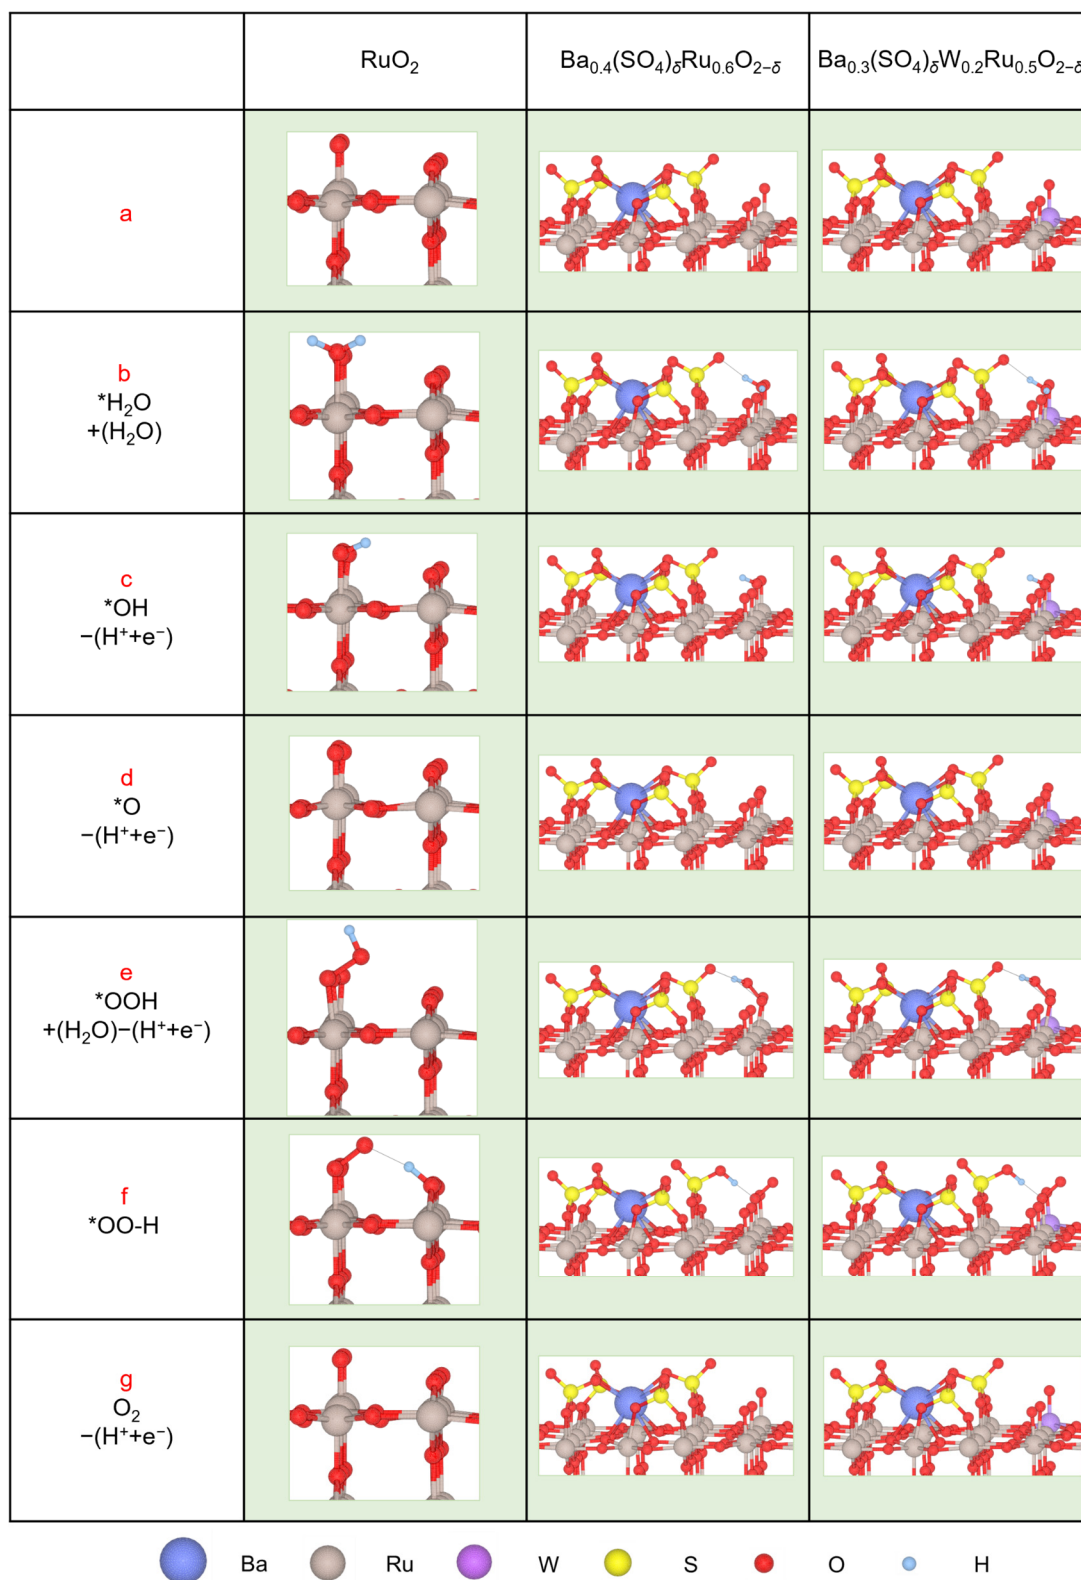

**Supplementary Figure 20** Atomic structure of catalysts and intermediates during the OER process.

**Supplementary Note 4:** For RuO<sub>2</sub>, an H<sub>2</sub>O molecule is adsorbed on the 1f-cus Ru site of the RuO<sub>2</sub>(110) plane (a to b) and undergoes continuous deprotonation, leading to the formation of \*OH and \*O on the same site (b to c, c to d). Subsequently, a second H<sub>2</sub>O molecule is adsorbed onto the \*O and deprotonates,

resulting in the formation of \*OOH (d to e). Afterward, the \*OOH donates a proton to an adjacent O site to form \*OO-H (e to f). Finally, the \*OO-H undergoes deprotonation, leading to the release of O<sub>2</sub> (f to g).

For Ba<sub>0.4</sub>(SO<sub>4</sub>)<sub>δ</sub>Ru<sub>0.6</sub>O<sub>2-δ</sub>, the OER process is similar to RuO<sub>2</sub>. An H<sub>2</sub>O molecule is adsorbed on the 1f-cus Ru site (a to b), and deprotonated to form \*OH and \*O on this site (b to c, c to d). Then, a second H<sub>2</sub>O molecule is adsorbed on \*O and deprotonates to form \*OOH (d to e). Here, the \*OOH donates a proton to an adjacent O site, which belongs to a sulfate to form \*OO-H (e to f). Finally, the \*OO-H is deprotonated and an O<sub>2</sub> is released (f to g).

For Ba<sub>0.3</sub>(SO<sub>4</sub>)<sub>δ</sub>W<sub>0.2</sub>Ru<sub>0.5</sub>O<sub>2-δ</sub>, the OER process is identical to that of Ba<sub>0.4</sub>(SO<sub>4</sub>)<sub>δ</sub>Ru<sub>0.6</sub>O<sub>2-δ</sub>. In Ba<sub>0.3</sub>(SO<sub>4</sub>)<sub>δ</sub>W<sub>0.2</sub>Ru<sub>0.5</sub>O<sub>2-δ</sub>, a Ru atom adjacent to the active site in the crystal is replaced with a W atom, forming Ru-O-W. This substitution allows W to modulate the electronic structure of the 1f-cus-Ru site, thereby adjusting the adsorption energy of the reaction intermediates.

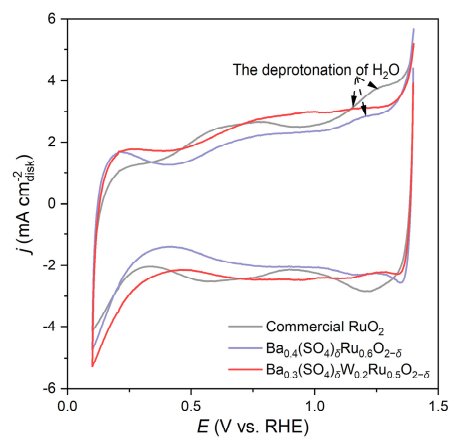

**Supplementary Figure 21** Cyclic voltammograms of commercial  $\text{RuO}_2$ ,  $\text{Ba}_{0.4}(\text{SO}_4)_\delta\text{Ru}_{0.6}\text{O}_{2-\delta}$ , and  $\text{Ba}_{0.3}(\text{SO}_4)_\delta\text{W}_{0.2}\text{Ru}_{0.5}\text{O}_{2-\delta}$  in Ar-saturated 0.5 M  $\text{H}_2\text{SO}_4$  at a scan rate of  $50 \text{ mV s}^{-1}$ .



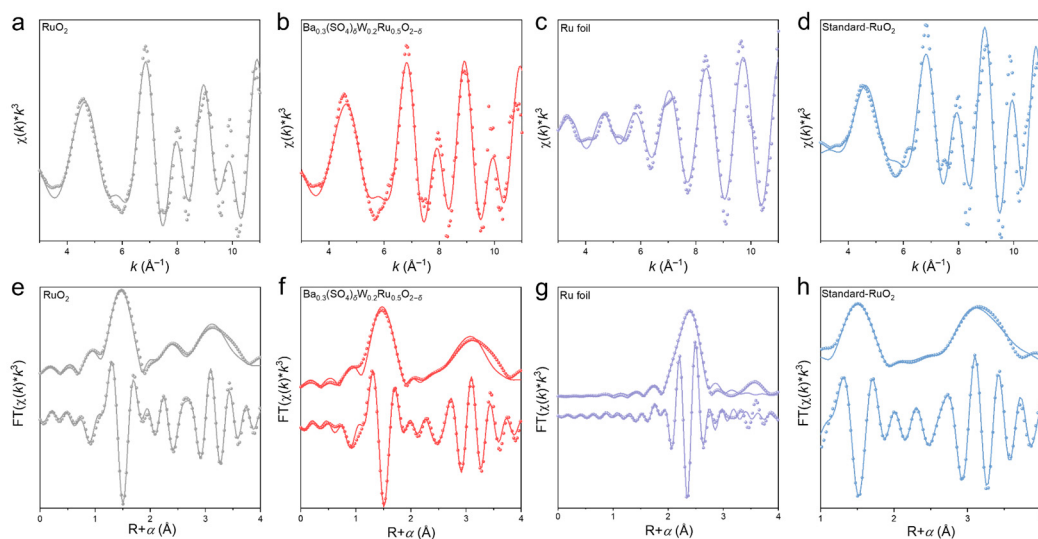

**Supplementary Figure 22 a-d** Ru K-edge EXAFS (points) and the curvefit (line) for (a) RuO<sub>2</sub>, (b) Ba<sub>0.3</sub>(SO<sub>4</sub>)<sub>δ</sub>W<sub>0.2</sub>Ru<sub>0.5</sub>O<sub>2-δ</sub>, (c) Ru foil, and (d) standard-RuO<sub>2</sub>, shown in  $k^3$ -weighted  $k$ -space. **e-h**, Ru K-edge EXAFS (points) and the curvefit (line) for (e) RuO<sub>2</sub>, (f) Ba<sub>0.3</sub>(SO<sub>4</sub>)<sub>δ</sub>W<sub>0.2</sub>Ru<sub>0.5</sub>O<sub>2-δ</sub>, (g) Ru foil, and (h) standard-RuO<sub>2</sub>, shown in  $R$ -space (FT magnitude and imaginary component). The data are  $k^3$ -weighted and not phase-corrected.

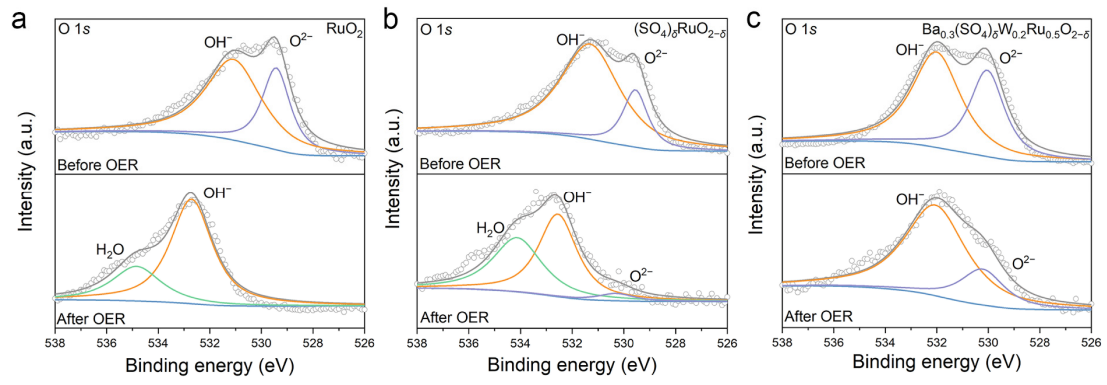

**Supplementary Figure 23 a-c** High-resolution O 1s XPS spectra of **(a)**  $\text{RuO}_2$ , **(b)**  $(\text{SO}_4)_\delta\text{RuO}_{2-\delta}$ , and **(c)**  $\text{Ba}_{0.3}(\text{SO}_4)_\delta\text{W}_{0.2}\text{Ru}_{0.5}\text{O}_{2-\delta}$  before and after OER.

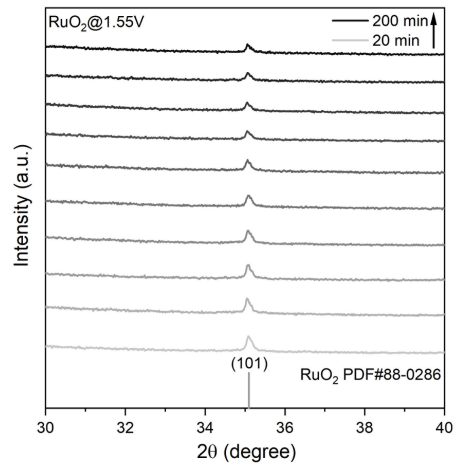

**Supplementary Figure 24** Time-resolved *in-situ* XRD patterns of RuO<sub>2</sub> during 200 min acidic OER at 1.55 V.

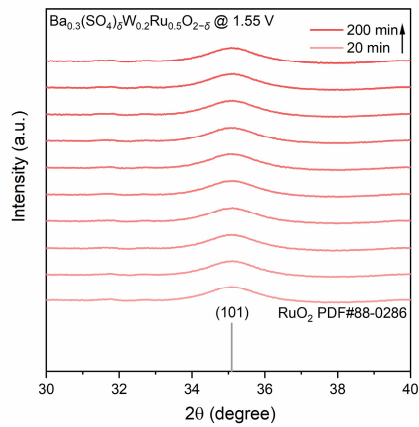

**Supplementary Figure 25** Time-resolved *in-situ* XRD patterns of  $\text{Ba}_{0.3}(\text{SO}_4)_\delta\text{W}_{0.2}\text{Ru}_{0.5}\text{O}_{2-\delta}$  during 200 min acidic OER at 1.55 V.

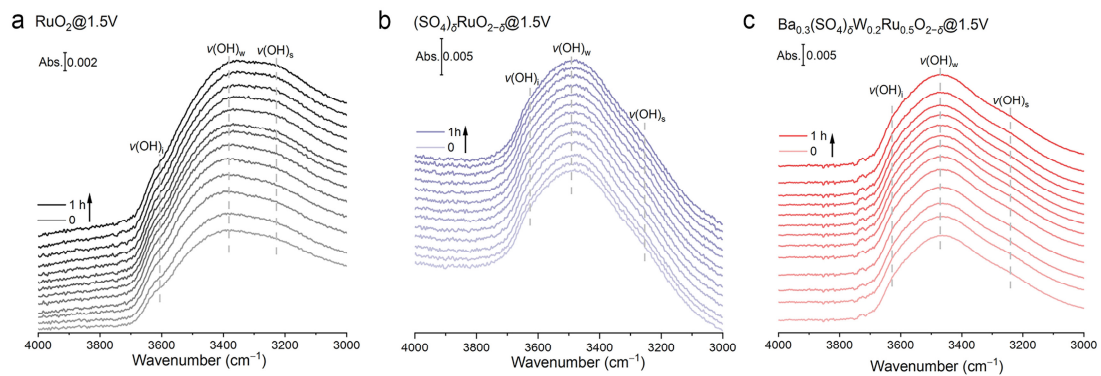

**Supplementary Figure 26 a-c** Time-resolved *in-situ* ATR-SEIRAS spectra of **(a)**  $\text{RuO}_2$ , **(b)**  $(\text{SO}_4)_\delta\text{RuO}_{2-\delta}$ , and **(c)**  $\text{Ba}_{0.3}(\text{SO}_4)_\delta\text{W}_{0.2}\text{Ru}_{0.5}\text{O}_{2-\delta}$  over the course of 1 h acidic OER at 1.5 V.

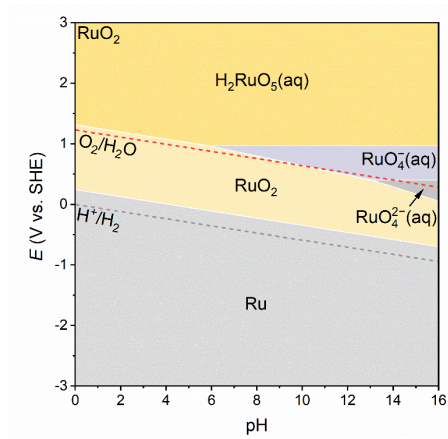

**Supplementary Figure 27** Ru Pourbaix diagram for RuO<sub>2</sub> generated with an aqueous ion concentration of  $10^{-6}$  M at 25 °C.

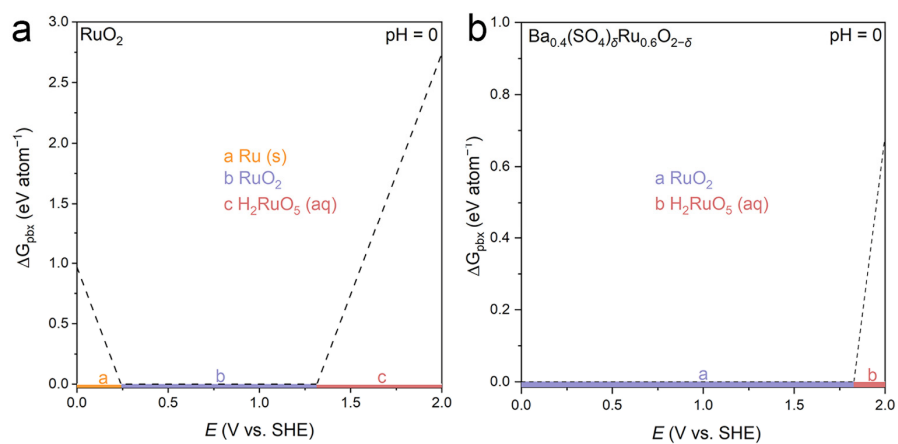

**Supplementary Figure 28 a,b** Pourbaix decomposition free energy ( $\Delta G_{\text{pbx}}$ ) of (a)  $\text{RuO}_2$  and (b)  $\text{Ba}_{0.4}(\text{SO}_4)_\delta\text{Ru}_{0.6}\text{O}_{2-\delta}$  at potentials between 0 and 2.0 V.

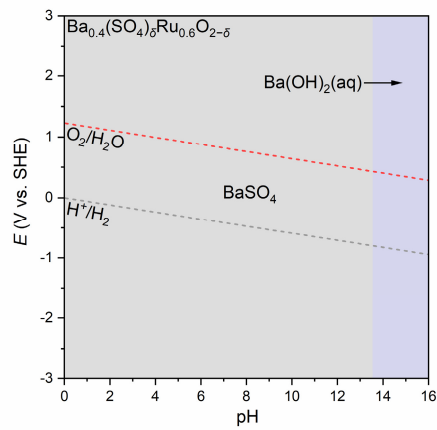

**Supplementary Figure 29** Ba Pourbaix diagram for  $\text{Ba}_{0.4}(\text{SO}_4)_\delta\text{Ru}_{0.6}\text{O}_{2-\delta}$  generated with an aqueous ion concentration of  $10^{-6}$  M at 25 °C.



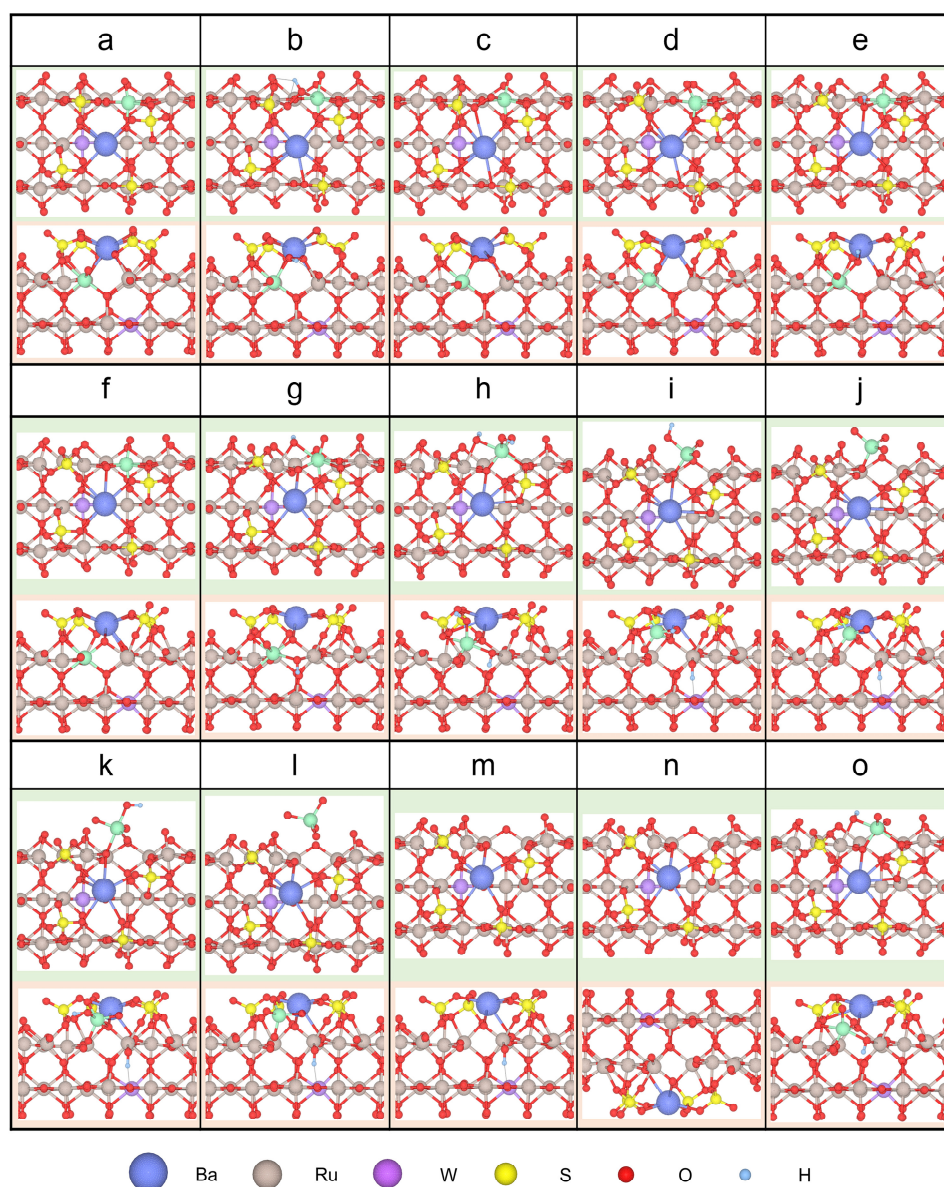

**Supplementary Figure 30** Atomic structures of catalysts and intermediates during Ru dissolution on  $\text{Ba}_{0.3}(\text{SO}_4)_\delta\text{W}_{0.2}\text{Ru}_{0.5}\text{O}_{2-\delta}$ .

**Supplementary Note 5:** In the most possible thermodynamic deactivation pathway of  $\text{Ba}_{0.3}(\text{SO}_4)_\delta\text{W}_{0.2}\text{Ru}_{0.5}\text{O}_{2-\delta}$ , the adsorption and deprotonation of water are optimized on the most energetically favorable sites. Benefiting from the protection of Ba-anchored sulfate, the deactivation of  $\text{Ba}_{0.3}(\text{SO}_4)_\delta\text{W}_{0.2}\text{Ru}_{0.5}\text{O}_{2-\delta}$  needs to overcome two positive free energy difference in the steps from *a* to *b* and *k* to *l*, respectively, while that of  $\text{RuO}_2$  is almost spontaneous – that means, it is more difficult and sluggish for  $\text{Ba}_{0.3}(\text{SO}_4)_\delta\text{W}_{0.2}\text{Ru}_{0.5}\text{O}_{2-\delta}$  to deactivate than  $\text{RuO}_2$ .

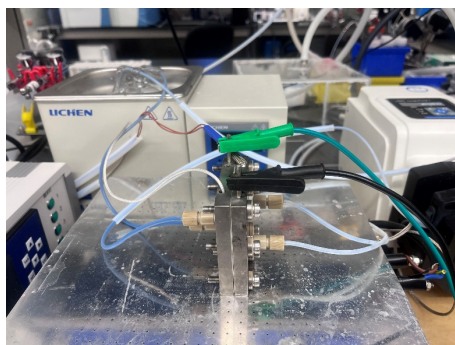

**Supplementary Figure 31** Photograph of the PEMWE.

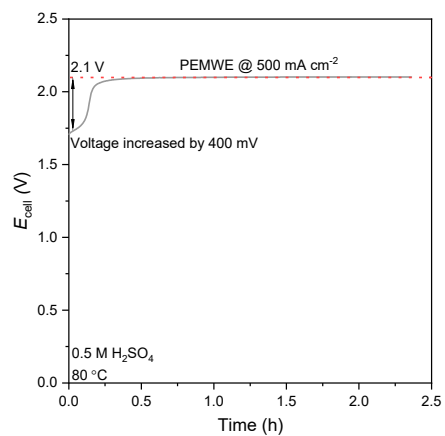

**Supplementary Figure 32** Chronopotentiogram of commercial RuO<sub>2</sub>-based PEMWE operated at 500 mA cm<sup>-2</sup> in 0.5 M H<sub>2</sub>SO<sub>4</sub> under 80 °C.

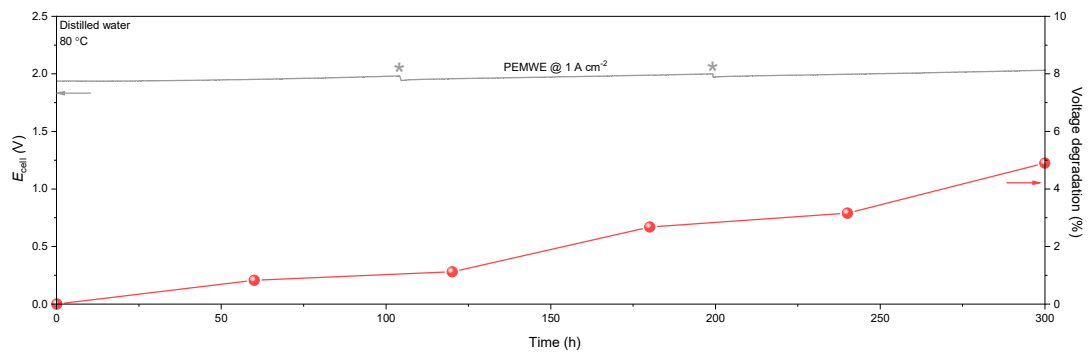

**Supplementary Figure 33** Chronopotentiogram and voltage degradation of  $\text{Ba}_{0.3}(\text{SO}_4)_\delta\text{W}_{0.2}\text{Ru}_{0.5}\text{O}_{2-\delta}$ -based PEMWE operated at  $1 \text{ A cm}^{-2}$  in distilled water under  $80 \text{ }^\circ\text{C}$ . Of note, the gray asterisks represent the replenishment of fresh electrolytes, and the difference in cell voltage between  $0.5 \text{ M H}_2\text{SO}_4$  and distilled water results from the impedance difference between the electrolyte and the MEA.

## Supplementary Tables

**Supplementary Table 1.** The binding energy of various metal cations with sulfate on the surface of RuO<sub>2</sub> (110) plane.

| Metal | Binding Energy (eV) | Metal | Binding Energy (eV) | Metal | Binding Energy (eV) | Metal | Binding Energy (eV) |
|-------|---------------------|-------|---------------------|-------|---------------------|-------|---------------------|
| Au    | -3.26               | Te    | -7.01               | Al    | -8.65               | Re    | -14.5               |
| Ag    | -4.03               | Ni    | -7.11               | Fe    | -8.82               | V     | -14.6               |
| Cd    | -4.8                | Ge    | -7.23               | Mg    | -8.94               | Sc    | -14.8               |
| Se    | -5.15               | Pt    | -7.33               | Ir    | -9.5                | Ti    | -15.3               |
| Ga    | -5.17               | Sn    | -7.36               | Be    | -10.2               | Pr    | -15.6               |
| Zn    | -5.49               | Sb    | -7.51               | Sr    | -10.4               | Y     | -15.9               |
| Cu    | -5.63               | Pb    | -7.56               | Ca    | -10.5               | La    | -16                 |
| Pd    | -5.81               | In    | -7.78               | Ru    | -10.5               | Mo    | -16                 |
| Na    | -5.92               | Co    | -7.85               | Ba    | -10.8               | Ce    | -17.1               |
| K     | -6.04               | Bi    | -7.93               | Eu    | -11.4               | Gd    | -17.1               |
| Li    | -6.52               | Rh    | -8.01               | Cr    | -12.1               | Zr    | -18.6               |
| As    | -6.87               | Mn    | -8.6                | Nd    | -14.5               | Nb    | -19                 |
| W     | -19.19              | Hf    | -19.3               | Ta    | -20.2               |       |                     |

**Supplementary Table 2.** OER performances of the Ru-based catalysts in this work.

| Catalysts                                                                             | Loading<br>( $\mu\text{g cm}^{-2}$ ) | ECSA<br>( $\text{cm}^2_{\text{oxide}}$ ) | Overpotential<br>(V) @<br>$10 \text{ mA cm}^{-2}$ | $j_m$ @ 1.45 V<br>( $\text{A mg}^{-1}_{\text{oxide}}$ ) | $j_s$ @ 1.45 V<br>( $\text{mA cm}^{-2}_{\text{oxide}}$ ) |
|---------------------------------------------------------------------------------------|--------------------------------------|------------------------------------------|---------------------------------------------------|---------------------------------------------------------|----------------------------------------------------------|
| $\text{RuO}_2$                                                                        | 125                                  | 83.4                                     | 282                                               | 0.003                                                   | 0.005                                                    |
| $\text{W}_{0.3}\text{Ru}_{0.7}\text{O}_2$                                             | 125                                  | 52.3                                     | 216                                               | 0.020                                                   | 0.047                                                    |
| $(\text{SO}_4)_\delta\text{RuO}_{2-\delta}$                                           | 125                                  | 71.1                                     | 225                                               | 0.013                                                   | 0.023                                                    |
| $\text{Ba}_{0.4}(\text{SO}_4)_\delta\text{Ru}_{0.6}\text{O}_{2-\delta}$               | 125                                  | 54.6                                     | 232                                               | 0.009                                                   | 0.022                                                    |
| $\text{Ba}_{0.3}(\text{SO}_4)_\delta\text{W}_{0.2}\text{Ru}_{0.5}\text{O}_{2-\delta}$ | 125                                  | 39.7                                     | 206                                               | 0.034                                                   | 0.105                                                    |

**Supplementary Table 3.** The amount of dissolved Ru, Ba and W for various catalysts after OER.

| Catalyst                                                                              | Ru Loading ( $\mu\text{g}$ ) | Ba Loading ( $\mu\text{g}$ ) | W Loading ( $\mu\text{g}$ ) | Dissolved Ru ( $\mu\text{g}$ ) | Dissolved Ba ( $\mu\text{g}$ ) | Dissolved W ( $\mu\text{g}$ ) |
|---------------------------------------------------------------------------------------|------------------------------|------------------------------|-----------------------------|--------------------------------|--------------------------------|-------------------------------|
| $\text{RuO}_2$                                                                        | 95.05                        |                              |                             | 33.84                          |                                |                               |
| $\text{W}_{0.3}\text{Ru}_{0.7}\text{O}_2$                                             | 70.12                        |                              | 55.24                       | 16.90                          |                                | 7.23                          |
| $(\text{SO}_4)_\delta\text{RuO}_{2-\delta}$                                           | 100.25                       |                              |                             | 19.25                          |                                |                               |
| $\text{Ba}_{0.4}(\text{SO}_4)_\delta\text{Ru}_{0.6}\text{O}_{2-\delta}$               | 62.54                        | 46.93                        |                             | 7.19                           | 1.59                           |                               |
| $\text{Ba}_{0.3}(\text{SO}_4)_\delta\text{W}_{0.2}\text{Ru}_{0.5}\text{O}_{2-\delta}$ | 45.12                        | 33.82                        | 34.76                       | 3.20                           | 0.81                           | 3.22                          |

**Supplementary Table 4.** The stability number (S-number) of various catalysts after OER stability test.

| Catalyst                                                                              | Ru loss (%) | Ba loss (%) | W loss (%) | Reaction time (h) | S-number |
|---------------------------------------------------------------------------------------|-------------|-------------|------------|-------------------|----------|
| $\text{RuO}_2$                                                                        | 35.6        |             |            | 1.5               | 418      |
| $\text{W}_{0.3}\text{Ru}_{0.7}\text{O}_2$                                             | 24.11       |             | 13.08      | 55                | 30682    |
| $(\text{SO}_4)_\delta\text{RuO}_{2-\delta}$                                           | 19.19       |             |            | 160               | 78360    |
| $\text{Ba}_{0.4}(\text{SO}_4)_\delta\text{Ru}_{0.6}\text{O}_{2-\delta}$               | 11.49       | 3.39        |            | 316               | 414346   |
| $\text{Ba}_{0.3}(\text{SO}_4)_\delta\text{W}_{0.2}\text{Ru}_{0.5}\text{O}_{2-\delta}$ | 7.09        | 2.40        | 9.26       | 1000              | 2946151  |



**Supplementary Table 5.** Summary of the reported Ru-based OER catalysts under acidic conditions.

| Catalyst                                                                                                                                  | Loading ( $\mu\text{g cm}^{-2}$ ) | Electrolyte                          | Overpotential @10 mA $\text{cm}^{-2}$ (mV) | Overpotential increase @10 mA $\text{cm}^{-2}$ | Ref.      |
|-------------------------------------------------------------------------------------------------------------------------------------------|-----------------------------------|--------------------------------------|--------------------------------------------|------------------------------------------------|-----------|
| Ni-RuO <sub>2</sub>                                                                                                                       | 400                               | 0.1 M HClO <sub>4</sub>              | 214                                        | Stable for 200 h                               | 1         |
| Co-RuIr                                                                                                                                   | 50                                | 0.1 M HClO <sub>4</sub>              | 235                                        | Stable for 25 h                                | 2         |
| Faceted Ru                                                                                                                                | 127                               | 0.1 M HClO <sub>4</sub>              | 180                                        | 85 mV for 4 h                                  | 3         |
| Ru <sub>1</sub> -Pt <sub>3</sub> Cu                                                                                                       | 21                                | 0.1 M HClO <sub>4</sub>              | 220                                        | 30 mV for 28 h                                 | 4         |
| Bi <sub>x</sub> Er <sub>2-x</sub> Ru <sub>2</sub> O <sub>7</sub>                                                                          | 830                               | 0.1 M HClO <sub>4</sub>              | 180                                        | Stable for 100 h                               | 5         |
| Cu-doped RuO <sub>2</sub>                                                                                                                 | 275                               | 0.5 M H <sub>2</sub> SO <sub>4</sub> | 188                                        | 83 mV for 8 h                                  | 6         |
| CaCu <sub>3</sub> Ru <sub>4</sub> O <sub>12</sub>                                                                                         | 250                               | 0.5 M H <sub>2</sub> SO <sub>4</sub> | 171                                        | 21 mV for 24 h                                 | 7         |
| Cr <sub>0.6</sub> Ru <sub>0.4</sub> O <sub>2</sub>                                                                                        | 283                               | 0.5 M H <sub>2</sub> SO <sub>4</sub> | 178                                        | Stable for 10 h                                | 8         |
| W <sub>0.2</sub> Er <sub>0.1</sub> Ru <sub>0.7</sub> O <sub>2-<math>\delta</math></sub>                                                   | 330                               | 0.5 M H <sub>2</sub> SO <sub>4</sub> | 168                                        | 83 mV for 500 h                                | 9         |
| Li <sub>0.52</sub> RuO <sub>2</sub>                                                                                                       | 637                               | 0.5 M H <sub>2</sub> SO <sub>4</sub> | 156                                        | Stable for 70 h                                | 10        |
| Y <sub>1.7</sub> Sr <sub>0.3</sub> Ru <sub>2</sub> O <sub>7</sub>                                                                         | 71                                | 0.5 M H <sub>2</sub> SO <sub>4</sub> | 264                                        | Stable for 28 h                                | 11        |
| RuNi <sub>2</sub> @G-250                                                                                                                  | 320                               | 0.5 M H <sub>2</sub> SO <sub>4</sub> | 227                                        | Stable for 3 h                                 | 12        |
| Ba <sub>0.3</sub> (SO <sub>4</sub> ) <sub><math>\delta</math></sub> W <sub>0.2</sub> Ru <sub>0.5</sub> O <sub>2-<math>\delta</math></sub> | 125                               | 0.5 M H <sub>2</sub> SO <sub>4</sub> | 206                                        | 43 mV for 1,000 h                              | This work |

**Supplementary Table 6.** Curvefit parameters for Ru K-edge EXAFS for various samples ( $S_0^2=0.9$ ).

| Catalyst                                                                                                                                  | Path  | R( $\text{\AA}$ ) <sup>a</sup> | N <sup>b</sup> | $\sigma^2$ ( $10^{-3}\text{\AA}^2$ ) <sup>c</sup> | $\Delta E_0$ (eV) <sup>d</sup> | R factor |
|-------------------------------------------------------------------------------------------------------------------------------------------|-------|--------------------------------|----------------|---------------------------------------------------|--------------------------------|----------|
| RuO <sub>2</sub>                                                                                                                          | Ru-O  | 1.97                           | 4.4            | 2.4                                               |                                |          |
|                                                                                                                                           | Ru-Ru | 2.7                            | 1              | 1.2                                               | -1.32                          | 0.016    |
|                                                                                                                                           | Ru-O  | 3.16                           | 2.5            | 3.5                                               |                                |          |
| Ba <sub>0.3</sub> (SO <sub>4</sub> ) <sub><math>\delta</math></sub> W <sub>0.2</sub> Ru <sub>0.5</sub> O <sub>2-<math>\delta</math></sub> | Ru-O  | 1.97                           | 4              | 0.6                                               |                                |          |
|                                                                                                                                           | Ru-Ru | 2.69                           | 1              | 4.2                                               | -1.71                          | 0.019    |
|                                                                                                                                           | Ru-O  | 3.15                           | 2              | 11.4                                              |                                |          |
| Ru foil                                                                                                                                   | Ru-Ru | 2.67                           | 12             | 3.6                                               | 3.59                           | 0.013    |
| Standard RuO <sub>2</sub>                                                                                                                 | Ru-O  | 1.96                           | 6              | -0.3                                              |                                |          |
|                                                                                                                                           | Ru-Ru | 2.66                           | 6              | -1.5                                              | -0.32                          | 0.018    |
|                                                                                                                                           | Ru-O  | 3.17                           | 2              | 4.9                                               |                                |          |

<sup>a</sup>R: Bond distance; <sup>b</sup>N: coordination numbers; <sup>c</sup> $\sigma^2$ : Debye-Waller factors; <sup>d</sup> $\Delta E_0$ : the inner potential correction;  $S_0^2$ : the amplitude reduction factor, which was set to 0.9 in the fittings; R factor: goodness of fit.

**Supplementary Table 7.** Free energies of formation for DFT-computed phases in Pourbaix analysis.

| RuO <sub>2</sub>                     |       | Ba <sub>0.4</sub> (SO <sub>4</sub> ) <sub>δ</sub> Ru <sub>0.6</sub> O <sub>2-δ</sub> |       |                                    |        |
|--------------------------------------|-------|--------------------------------------------------------------------------------------|-------|------------------------------------|--------|
| Ru                                   | 0     | Ru                                                                                   | 0     | Ba                                 | 0      |
| RuO <sub>2</sub>                     | -3.95 | RuO <sub>2</sub>                                                                     | -6.00 | Ba <sup>2+</sup> (aq)              | -6.17  |
| RuO <sub>4</sub> <sup>2-</sup> (aq)  | -4.98 | RuO <sub>4</sub> <sup>2-</sup> (aq)                                                  | -4.98 | BaOH <sup>+</sup> (aq)             | -7.83  |
| RuO <sub>4</sub> <sup>-</sup> (aq)   | -4.58 | RuO <sub>4</sub> <sup>-</sup> (aq)                                                   | -4.58 | SO <sub>4</sub> <sup>2-</sup> (aq) | -8.43  |
| H <sub>2</sub> RuO <sub>5</sub> (aq) | -6.07 | H <sub>2</sub> RuO <sub>5</sub> (aq)                                                 | -6.07 | BaSO <sub>4</sub>                  | -14.60 |

**Supplementary Table 8.** Summary of the reported PEMWE stability using different Ru-based OER catalysts.

| Anode catalyst                                                                                        | Mass loading (mg cm <sup>-2</sup> ) | PEM  | Cell temperature (°C) | Electrolyte                          | Current density (A cm <sup>-2</sup> ) | Cell voltage increase | Ref.      |
|-------------------------------------------------------------------------------------------------------|-------------------------------------|------|-----------------------|--------------------------------------|---------------------------------------|-----------------------|-----------|
| PtCo–RuO <sub>2</sub> /C                                                                              | 2.5                                 | N212 | 80                    | Distilled water                      | 1                                     | 11 mV for 24 h        | 13        |
| RuO <sub>2</sub> /SnO <sub>2</sub>                                                                    | 3                                   | N115 | 30                    | Distilled water                      | 0.25                                  | ~ 400 mV for 235 h    | 14        |
| RuO <sub>2</sub> NS                                                                                   | 1.2                                 | N212 | 90                    | Distilled water                      | 1                                     | Stable for 10 h       | 15        |
| Ni-RuO <sub>2</sub>                                                                                   | ~3.1                                | N117 | Room temperature      | 0.1 M HClO <sub>4</sub>              | 0.2                                   | Stable for 1,000 h    | 1         |
| W <sub>0.2</sub> Er <sub>0.1</sub> Ru <sub>0.7</sub> O <sub>2-δ</sub>                                 | Not given                           | N117 | Room temperature      | 0.5 M H <sub>2</sub> SO <sub>4</sub> | 0.1                                   | ~ 100 mV for 120 h    | 9         |
| Ba <sub>0.3</sub> (SO <sub>4</sub> ) <sub>δ</sub> W <sub>0.2</sub> Ru <sub>0.5</sub> O <sub>2-δ</sub> | 3                                   | N115 | 80                    | 0.5 M H <sub>2</sub> SO <sub>4</sub> | 0.5                                   | 108 mV for 300 h      | This work |

## Supplementary References

- 1 Wu, Z. Y. *et al.* Non-iridium-based electrocatalyst for durable acidic oxygen evolution reaction in proton exchange membrane water electrolysis. *Nat. Mater.* **22**, 100-108 (2023).
- 2 Shan, J., Ling, T., Davey, K., Zheng, Y. & Qiao, S. Z. Transition-metal-doped RuIr bifunctional nanocrystals for overall water splitting in acidic environments. *Adv. Mater.* **31**, e1900510 (2019).
- 3 Poerwoprajitno, A. R. *et al.* Formation of branched ruthenium nanoparticles for improved electrocatalysis of oxygen evolution reaction. *Small* **15**, e1804577 (2019).
- 4 Yao, Y. *et al.* Engineering the electronic structure of single atom Ru sites via compressive strain boosts acidic water oxidation electrocatalysis. *Nat. Catal.* **2**, 304-313 (2019).
- 5 Zhou, G. *et al.* Spin-related symmetry breaking induced by half-disordered hybridization in  $\text{Bi}_x\text{Er}_{2-x}\text{Ru}_2\text{O}_7$  pyrochlores for acidic oxygen evolution. *Nat. Commun.* **13**, 4106 (2022).
- 6 Su, J. *et al.* Assembling ultrasmall copper-doped ruthenium oxide nanocrystals into hollow porous polyhedra: highly robust electrocatalysts for oxygen evolution in acidic media. *Adv. Mater.* **30**, 1801351 (2018).
- 7 Miao, X. *et al.* Quadruple perovskite ruthenate as a highly efficient catalyst for acidic water oxidation. *Nat. Commun.* **10**, 3809 (2019).
- 8 Lin, Y. *et al.* Chromium-ruthenium oxide solid solution electrocatalyst for highly efficient oxygen evolution reaction in acidic media. *Nat. Commun.* **10**, 162 (2019).
- 9 Hao, S. *et al.* Dopants fixation of ruthenium for boosting acidic oxygen evolution stability and activity. *Nat. Commun.* **11**, 5368 (2020).
- 10 Qin, Y. *et al.*  $\text{RuO}_2$  electronic structure and lattice strain dual engineering for enhanced acidic oxygen evolution reaction performance. *Nat. Commun.* **13**, 3784 (2022).
- 11 Zhang, N. *et al.* Metal substitution steering electron correlations in pyrochlore ruthenates for efficient acidic water oxidation. *ACS Nano* **15**, 8537-8548 (2021).
- 12 Cui, X. *et al.* Robust interface Ru centers for high-performance acidic oxygen evolution. *Adv. Mater.* **32**, e1908126 (2020).
- 13 Jin, H. *et al.* Safeguarding the  $\text{RuO}_2$  phase against lattice oxygen oxidation during acidic water electrooxidation. *Energy Environ. Sci.* **15**, 1119 (2022).
- 14 Lim, J. Y. *et al.* Highly stable  $\text{RuO}_2/\text{SnO}_2$  nanocomposites as anode electrocatalysts in a PEM water electrolysis cell. *Int. J. Energy Res.* **38**, 875-883 (2014).
- 15 Huang, H. *et al.* Structure engineering defective and mass transfer-enhanced  $\text{RuO}_2$  nanosheets for proton exchange membrane water electrolyzer. *Nano Energy* **88**, 106276 (2021).
